# Supplementary material
Source: PubMed Central journal article supplement (PMC2078108)
Supplement: oenvmed_63_6_371__1.pdf [file oenvmed_63_6_371__1.pdf]

## Appendix

Potential confounding factors, which were associated with low back, neck, or shoulder pain with a p value of 0.25 or less and with exclusion of mutually dependent confounding factors, SMASH, 1994–97 (n=1357)

| Low back pain                                            | Neck pain                                                      | Shoulder pain                                                  |
|----------------------------------------------------------|----------------------------------------------------------------|----------------------------------------------------------------|
| <i>General</i>                                           |                                                                |                                                                |
| Age                                                      | Age                                                            | Age                                                            |
| Years of employment                                      | Years of employment                                            | Years of employment                                            |
| Working hours per week                                   | Working hours per week                                         | Working hours per week                                         |
|                                                          | Education*                                                     | Education*                                                     |
| General health†                                          | General health†                                                | General health†                                                |
| Physical condition†                                      | Physical condition†                                            | Physical condition†                                            |
| Length                                                   | Length                                                         | Length                                                         |
| Body mass index                                          | Body mass index                                                | Body mass index                                                |
| Comorbidity: neck or shoulder pain‡                      | Comorbidity: low back or shoulder pain‡                        | Comorbidity: low back or neck pain‡                            |
| Previous low back pain§                                  | Previous neck pain§                                            | Previous shoulder pain§                                        |
| <i>Observed physical workload</i>                        |                                                                |                                                                |
| The number of lifts of 25kg during an 8 hour working day | The working time with repeated movements $\geq 4$ times/minute | The working time with repeated movements $\geq 4$ times/minute |
| The number of lifts of 10kg during an 8 hour working day | The working time with the neck in flexion $\geq 45^\circ$      | The number of lifts of 10kg during an 8 hour working day       |
| The working time with the                                | The working time with the                                      | The working time with the                                      |

| Low back pain                                               | Neck pain                                                   | Shoulder pain                                               |
|-------------------------------------------------------------|-------------------------------------------------------------|-------------------------------------------------------------|
| trunk in flexion $\geq 30^\circ$                            | neck in rotation $\geq 45^\circ$                            | neck in rotation $\geq 45^\circ$                            |
| The working time with the trunk in flexion $\geq 90^\circ$  | The working time with the neck in flexion $\geq 20^\circ$   | The working time with the neck in flexion $\geq 20^\circ$   |
| The working time with the trunk in rotation $\geq 30^\circ$ | The working time with upper arm elevation $\geq 60^\circ$   | The working time with upper arm elevation $\geq 30^\circ$   |
|                                                             | The working time sitting                                    |                                                             |
| <i>Self-reported physical workload</i>                      |                                                             |                                                             |
| Driving a vehicle¶                                          | Driving a vehicle¶                                          | Driving a vehicle¶                                          |
| Frequent flexion or rotation of the upper part of the body¶ | Frequent flexion or rotation of the upper part of the body¶ | Frequent flexion or rotation of the upper part of the body¶ |
| Working with vibrating tools¶                               | Working with vibrating tools¶                               | Working with vibrating tools¶                               |
| Activities in the same posture for a long time¶             | Activities in the same posture for a long time¶             |                                                             |
| Moving loads $\geq 5\text{kg}$ ¶                            |                                                             | Working with the arms above shoulder level¶                 |
| Moving loads $\geq 25\text{kg}$ ¶                           |                                                             | Pinching with hands¶                                        |
|                                                             |                                                             | Sitting§                                                    |
| <i>Self-reported psychosocial workload</i>                  |                                                             |                                                             |
| Quantitative job demands                                    | Quantitative job demands                                    | Quantitative job demands                                    |
| Supervisor support                                          | Supervisor support                                          | Supervisor support                                          |
| Co-worker support                                           | Co-worker support                                           | Co-worker support                                           |
| Decision authority                                          | Decision authority                                          | Decision authority                                          |

| Low back pain                                                                 | Neck pain                                                                     | Shoulder pain                                                                 |
|-------------------------------------------------------------------------------|-------------------------------------------------------------------------------|-------------------------------------------------------------------------------|
| Conflicting demands**                                                         | Conflicting demands**                                                         | Conflicting demands**                                                         |
| Job security**                                                                | Job security**                                                                | Job security**                                                                |
| Job satisfaction¶                                                             | Job satisfaction¶                                                             |                                                                               |
| <i>Self-reported physical load during leisure time</i>                        |                                                                               |                                                                               |
| Frequent flexion or rotation of the upper part of the body¶                   | Frequent flexion or rotation of the upper part of the body¶                   | Repeated movements with hands and/or arms¶                                    |
| Lifting loads $\geq 5\text{kg}$ ¶                                             | Video display terminal work¶                                                  | Video display terminal work¶                                                  |
| Lifting loads $\geq 25\text{kg}$ ¶                                            | Working with vibrating tools¶                                                 | Working with vibrating tools¶                                                 |
| Driving a vehicle¶                                                            | Driving a vehicle¶                                                            |                                                                               |
| Activities in the same posture for a long time¶                               | Activities in the same posture for a long time¶                               |                                                                               |
|                                                                               | Force exertion with hand and/or arms¶                                         | Force exertion with hand and/or arms¶                                         |
|                                                                               | Working with the arms above shoulder level¶                                   | Working with the arms above shoulder level¶                                   |
| Frequency of heavy physical activities during the past 4 months††             | Reaching¶                                                                     | Frequency of heavy physical activities during the past 4 months††             |
| Average number of hours of sports participation per week during the past year | Average number of hours of sports participation per week during the past year | Average number of hours of sports participation per week during the past year |

| Low back pain                                       | Neck pain                                           | Shoulder pain                                       |
|-----------------------------------------------------|-----------------------------------------------------|-----------------------------------------------------|
| Number of years of sports participation in the past | Number of years of sports participation in the past | Number of years of sports participation in the past |
| <i>Coping style and exposure to life events</i>     |                                                     |                                                     |
| Active problem solving                              | Active problem solving                              | Active problem solving                              |
| Avoidance behaviour                                 | Avoidance behaviour                                 | Avoidance behaviour                                 |
| Social support seeking                              | Social support seeking                              | Social support seeking                              |
| Number of life events during the past year‡‡        | Number of life events during the past year‡‡        | Number of life events during the past year‡‡        |

\*No education or primary school, lower secondary or vocational school, intermediate secondary or vocational school, higher secondary or vocational school, or university.

†Good, fairly, moderate, poor.

‡Regular, or prolonged pain in the past 12 months during follow up.

§Ever, or never.

¶Seldom/never, sometimes, quite often, or very often.

\*\*Agree, or disagree.

††More than three times/week, 1–2 times/week, 1–3 times/month, or less than once/month.

‡‡No, one, or more than one.
